# Supplementary material
Source: Springer Nature journal article supplement (https://www.springermedizin.de/resource/supplementary/12889_2001_20_MOESM3_ESM.pdf/9500180)

**Republic of Armenia  
Ministry of Health**

**National SES**

**Raion/City SESs  
52**

**Village Health Centers  
830**

**Polyclinics  
228**

**Hospitals  
179**

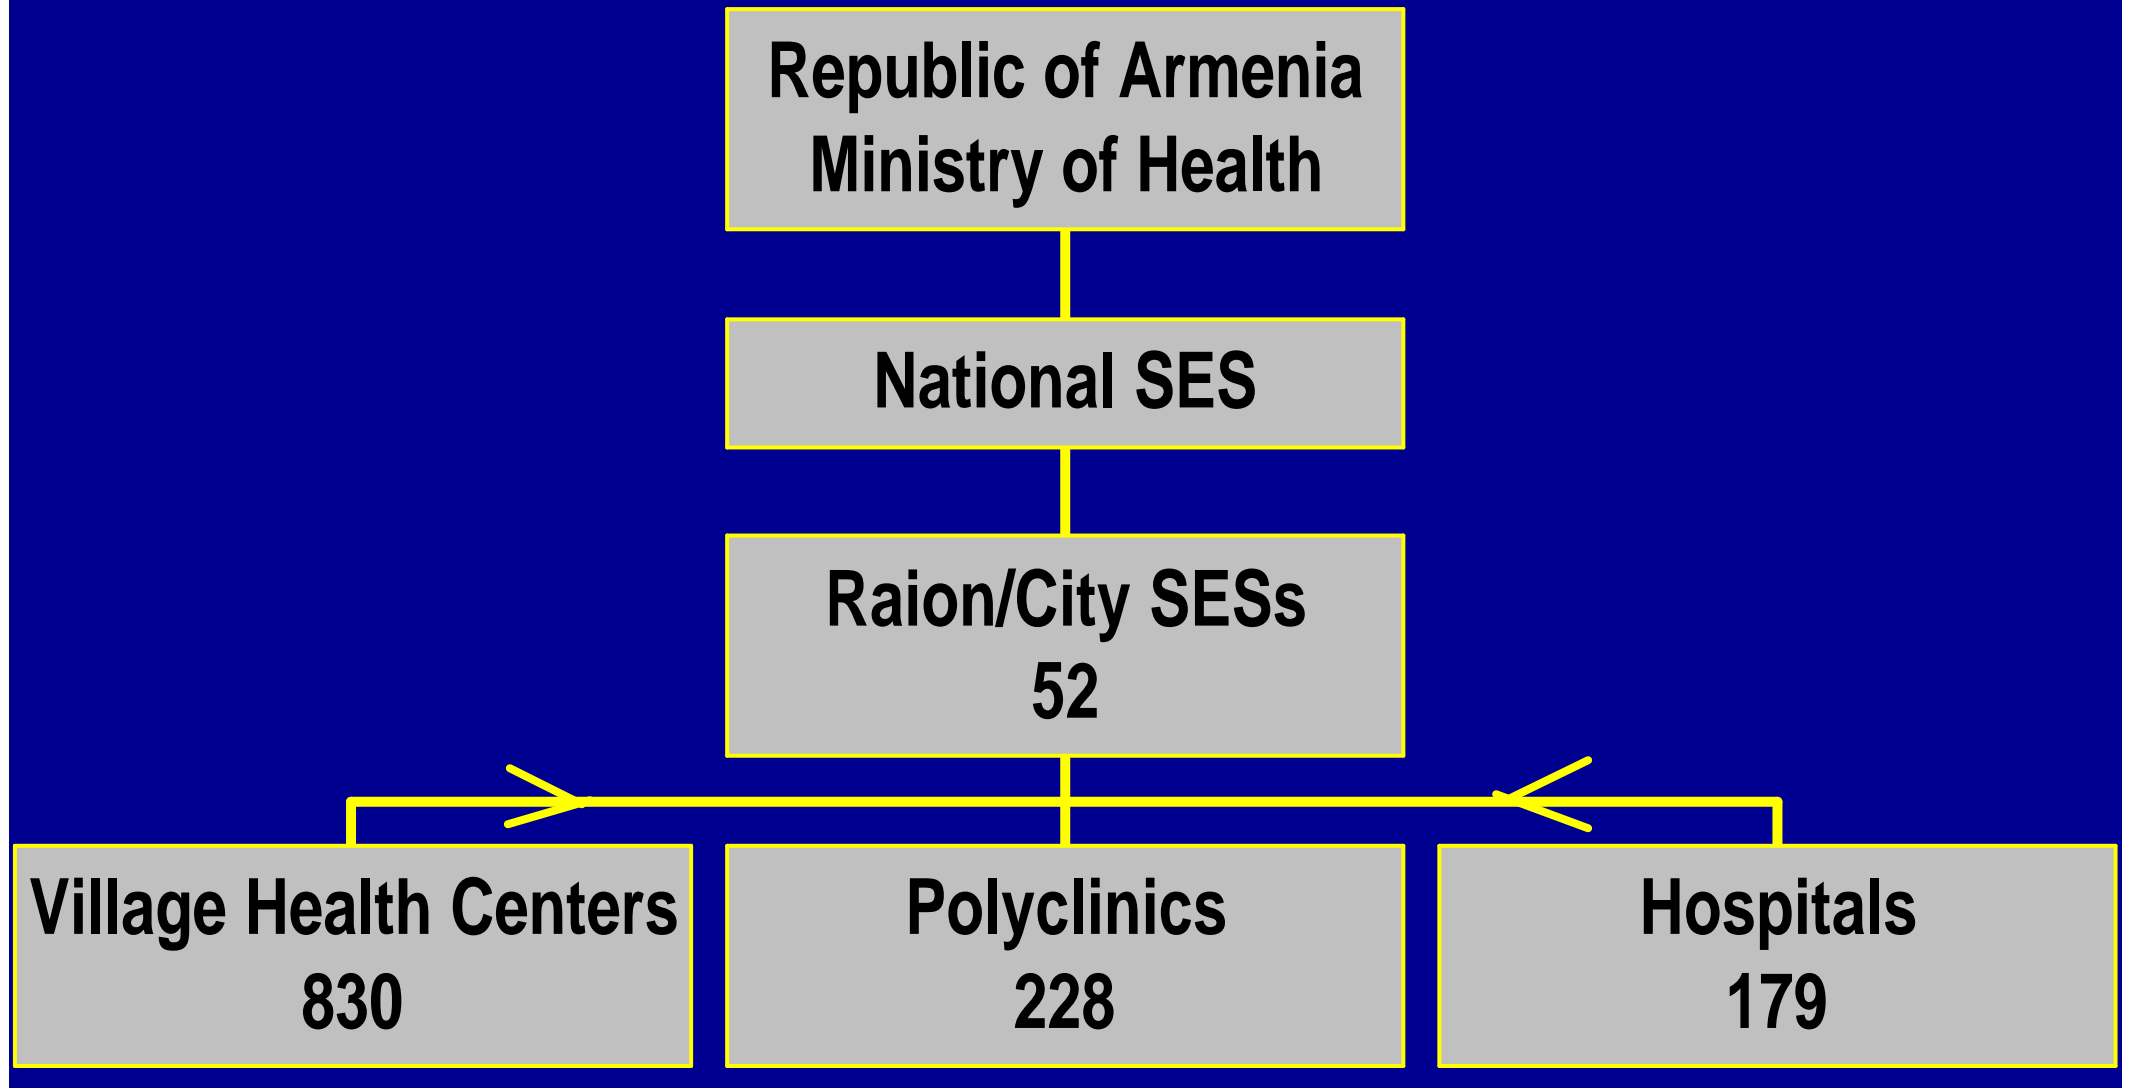

Supplement: MOESM3 [file 9500180]
